# Supplementary material for: Human Sperm Head Vacuoles Are Related to Nuclear-Envelope Invaginations
Source: MDPI journal article supplement (doi:10.3390/ijms241210027), 2023-06-12
Supplement: s1 [file s1]

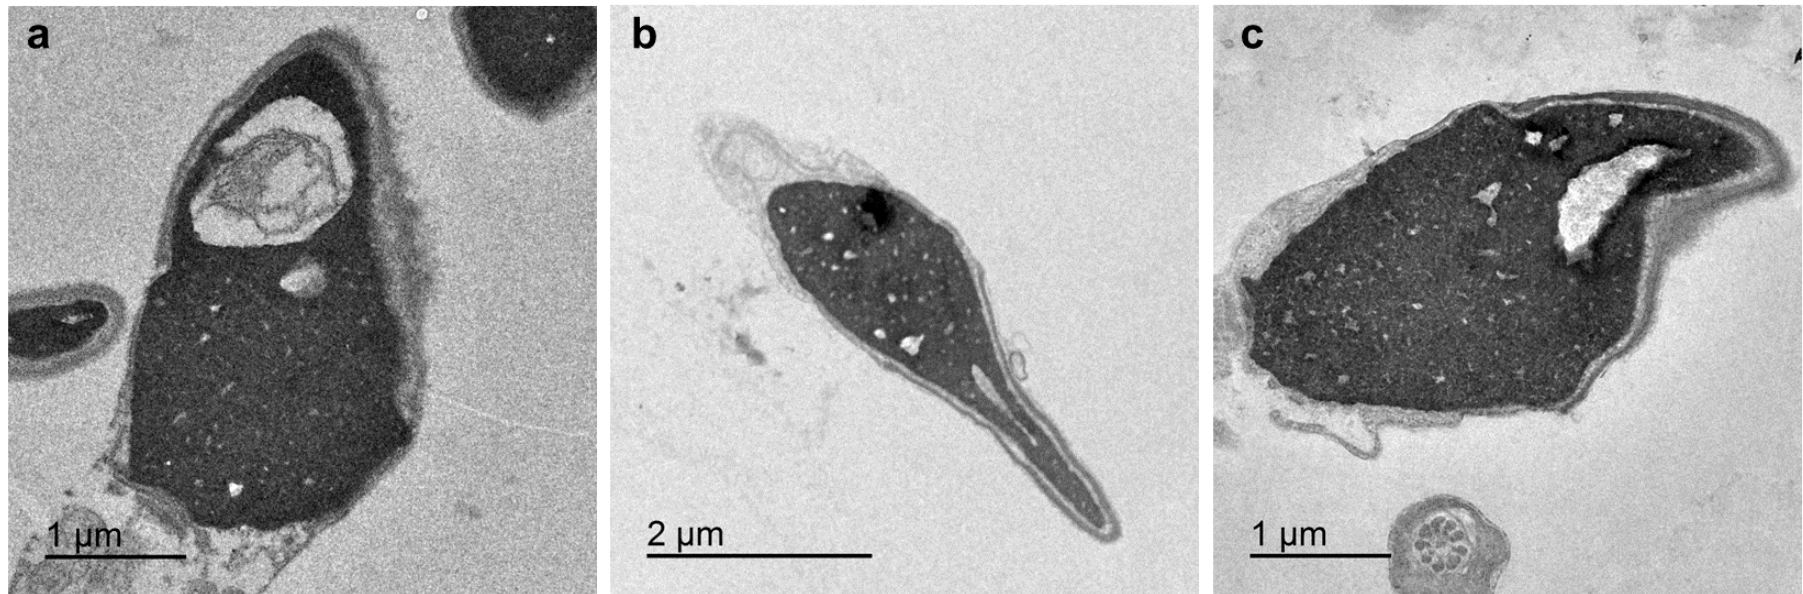

**Figure S1.** Transmission electron microscopy (TEM) micrographs of longitudinal sections of human spermatozoa showing negative controls. **(a)** Negative control omitting polyclonal anti-actin antibody. **(b)** Negative control omitting polyclonal anti-calicin antibody. **(c)** Negative control omitting monoclonal anti-CuZn-SOD antibody. Immunostainings were absent.
